# Supplementary material for: Cytotoxic effects of gold(i) complexes against colon, cervical and osteo carcinoma cell lines: a mechanistic approach
Source: Royal Society of Chemistry journal article supplement (doi:10.1039/c9nj02063b), 2019-01-01
Supplement: c9nj02063b1.pdf [file c9nj02063b1.pdf]

## **Cytotoxic effects of gold(I) complexes against colon, cervical and osteo carcinoma cell lines: A mechanistic approach**

Adam A. A. Sulaiman<sup>a</sup>, Namarta Kalia<sup>b</sup>, Gaurav Bhatia<sup>b</sup>, Manpreet Kaur<sup>c</sup>, M. Fettouhi<sup>d</sup>,  
Mohammad Altaf<sup>e</sup>, Nadeem Baig<sup>d</sup>, Abdel-Nasser Kawde<sup>d</sup>, Anvarhusein A. Isab<sup>d\*</sup>

<sup>a</sup>*Lab Technical Support Office (LTSO), King Fahd University of Petroleum and Minerals, Dhahran 31261, Saudi Arabia.*

<sup>b</sup>*Department of Molecular Biology and Biochemistry, Guru Nanak Dev University, Amritsar (Pb)-143005, India.*

<sup>c</sup>*Department of Human Genetics, Guru Nanak Dev University, Amritsar (Pb)-143005, India.*

<sup>d</sup>*Department of Chemistry, King Fahd University of Petroleum and Minerals, Dhahran 31261, Saudi Arabia.*

<sup>e</sup>*Department of Chemistry, GC University Lahore, PO Box 54000, Pakistan*

### **Supplementary materials**

**Table 1S.** Mid FT-IR frequencies (cm<sup>-1</sup>) of free ligand and Au(I) complexes (**0-2**).

| Ligand/<br>Complex      | Stretch<br>NH |      |      |            |      |      |      | Stretch<br>C=S |
|-------------------------|---------------|------|------|------------|------|------|------|----------------|
| [Au(Ipr)Cl]             | -             | 3073 | 1109 | 2960       | 1366 | 1258 | 1462 | -              |
| <b>Tu</b>               | 3405, 3274    | -    | -    | -          | -    | 1616 | 1468 | 1080           |
| <b>1</b>                | 3471, 3369    | 3166 | 1059 | 2963, 2869 | 1466 | 1630 | 1466 | 842            |
| <b>Me<sub>2</sub>Tu</b> | 3267          | -    | -    | -          | 1444 | 1525 | -    | 1040           |
| <b>2</b>                | 3377          | 3162 | 1133 | 2931, 2873 | 1371 | 1571 | 1462 | 985            |

**Table 2S.** <sup>1</sup>H NMR chemical shifts (ppm) for free ligands and gold(I) complexes (**0-2**) in CDCl<sub>3</sub>.

| Ligand/complex          | H-3    | H-4    | H-5    | H-6    | H-7    | H-8    | H-9    | N-H  |
|-------------------------|--------|--------|--------|--------|--------|--------|--------|------|
| [Au(Ipr)Cl]( <b>0</b> ) | 7.39 d | 7.55 t | 2.46 m | 1.33 d | 1.21 d | 7.98 s | -      | -    |
| <b>1</b>                | 7.36 d | 7.62 t | 2.49 m | 1.30 d | 1.24 d | 6.91 s | -      | 7.28 |
| <b>2</b>                | 7.35 d | 7.52 t | 2.50 m | 1.26 d | 1.21 d | 7.84 s | 2.80 s | 8.16 |
| <b>Tu</b>               | -      | -      | -      | -      | -      | -      | -      | 6.81 |
| <b>Me<sub>2</sub>Tu</b> | -      | -      | -      | -      | -      | -      | 2.81 s | 6.62 |

**Table 3S.** <sup>13</sup>C NMR chemical shifts (ppm) for free ligands and gold(I) complexes (**0-2**) in CDCl<sub>3</sub>.

| Ligand/<br>Complex      | C1    | C2    | C3    | C4    | C5   | C6   | C7   | C8    | Au=C  | C=S   | C11  |
|-------------------------|-------|-------|-------|-------|------|------|------|-------|-------|-------|------|
| [Au(Ipr)Cl]( <b>0</b> ) | 145.5 | 133.9 | 123.0 | 130.7 | 28.8 | 24.5 | 24.0 | 124.2 | 175.3 | -     | -    |
| <b>1</b>                | 145.3 | 133.1 | 123.7 | 129.8 | 28.1 | 23.8 | 23.3 | -     | 180.7 | 177.0 | -    |
| <b>2</b>                | 145.9 | 133.3 | 124.0 | 131.1 | 28.8 | 24.5 | 23.9 | 124.4 | 181.1 | 176.4 | 32.3 |
| <b>Tu</b>               | -     | -     | -     | -     | -    | -    | -    | -     | -     | 185.5 | -    |
| <b>Me<sub>2</sub>Tu</b> | -     | -     | -     | -     | -    | -    | -    | -     | -     | 182.3 | 30.8 |

**Table 4S.** Selected bond lengths and bond angles for complexes **1** and **2**.

| <b>Bond Length (Å)</b> |            | <b>Bond Angles (°)</b> |             |
|------------------------|------------|------------------------|-------------|
| <b>Complex 1</b>       |            |                        |             |
| Au1—S1                 | 2.3024(13) | C1—Au1—S1              | 177.12 (12) |
| Au1—C1                 | 1.995 (4)  | C28—S1—Au1             | 103.6 (2)   |
| S1—C28                 | 1.706 (6)  | N3—C28—N4              | 118.6 (6)   |
| N3—C28                 | 1.320 (9)  | S1—C28— N3             | 123.0 (4)   |
| N4—C28                 | 1.321 (7)  | S1—C28— N4             | 118.40 (4)  |
| <b>Complex 2</b>       |            |                        |             |
| Au1—S1                 | 2.2977(7)  | C4—Au1—S1              | 176.40 (7)  |
| Au1—C4                 | 2.007 (2)  | Au1—S1—C1              | 105.79 (10) |
| S1—C1                  | 1.724 (3)  | N1—C1—N2               | 119.20 (3)  |
| N1—C1                  | 1.326 (4)  | S1—C1— N1              | 122.40 (2)  |
| N2—C1                  | 1.322 (4)  | S1—C1— N2              | 118.40 (2)  |

**Table 5S.** Summary of crystal data and details of the structure refinement for complex **1** and **2**.

| <b>Complex</b>                                                                                                 | <b>1</b>                                                           | <b>2</b>                                                           |
|----------------------------------------------------------------------------------------------------------------|--------------------------------------------------------------------|--------------------------------------------------------------------|
| Empirical formula                                                                                              | C <sub>28</sub> H <sub>40</sub> AuF <sub>6</sub> N <sub>4</sub> PS | C <sub>30</sub> H <sub>44</sub> AuF <sub>6</sub> N <sub>4</sub> PS |
| Formula weight                                                                                                 | 806.63                                                             | 834.69                                                             |
| Crystal symmetry                                                                                               | Monoclinic                                                         | Monoclinic                                                         |
| Space group                                                                                                    | P 2 <sub>1</sub> /n                                                | P 2 <sub>1</sub> /c                                                |
| Crystal color                                                                                                  | Colorless                                                          | Colorless                                                          |
| Crystal size / mm                                                                                              | 0.65 × 0.39 × 0.20                                                 | 0.40 × 0.32 × 0.20                                                 |
| Wavelength/Å                                                                                                   | 0.71073                                                            | 0.71073                                                            |
| Temperature/K                                                                                                  | 298                                                                | 173                                                                |
| <b>a</b> (Å)                                                                                                   | 9.2495(8)                                                          | 8.6566 (2)                                                         |
| <b>b</b> (Å)                                                                                                   | 15.474(14)                                                         | 23.5651 (9)                                                        |
| <b>c</b> (Å)                                                                                                   | 23.370(2)                                                          | 17.3653 (5)                                                        |
| <b>β</b> (°)                                                                                                   | 96.419(2)                                                          | 98.966 (2)                                                         |
| Cell volume (Å <sup>3</sup> )                                                                                  | 3324.0(5)                                                          | 3499.1 (2)                                                         |
| <i>D</i> <sub>x</sub> (g m <sup>-3</sup> )                                                                     | 1.612                                                              | 1.686                                                              |
| <i>μ</i> (mm <sup>-1</sup> )                                                                                   | 4.594                                                              | 4.37                                                               |
| <i>Z</i>                                                                                                       | 4                                                                  | 4                                                                  |
| <i>θ</i> range (°)                                                                                             | 1.754 - 28.296                                                     | 1.468 - 25.642                                                     |
| <i>h, k, l</i> limits                                                                                          | -7:12, -20:20, -31:31                                              | -10:10, -28:28, -21:21                                             |
| <i>Reflns: Total, uniq., Rint</i>                                                                              | 23485, 8236, 0.0320                                                | 47989, 6605, 0.0417                                                |
| <i>Data/restraints/parameters</i>                                                                              | 8236 / 66 / 396                                                    | 6605 / 2 / 449                                                     |
| <i>R</i> [ <i>F</i> <sup>2</sup> > 2σ( <i>F</i> <sup>2</sup> )], <i>wR</i> ( <i>F</i> <sup>2</sup> ), <i>S</i> | 0.051, 0.160, 1.07                                                 | 0.020, 0.047, 1.01                                                 |
| <i>Δρ</i> <sub>max</sub> , <i>Δρ</i> <sub>min</sub> (e Å <sup>-3</sup> )                                       | 2.09, -3.31                                                        | 0.90, -0.58                                                        |

### MG-63

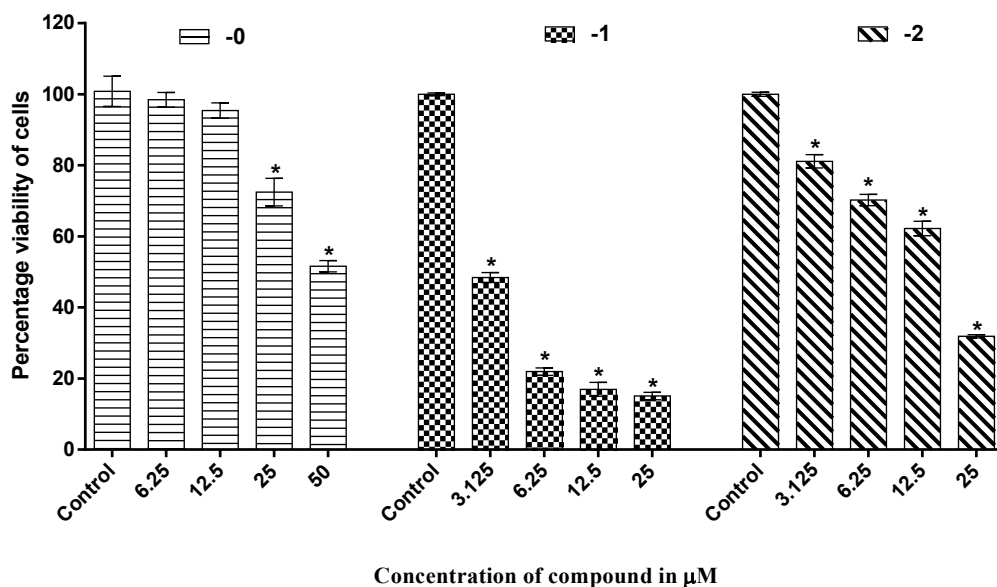

### MG-63

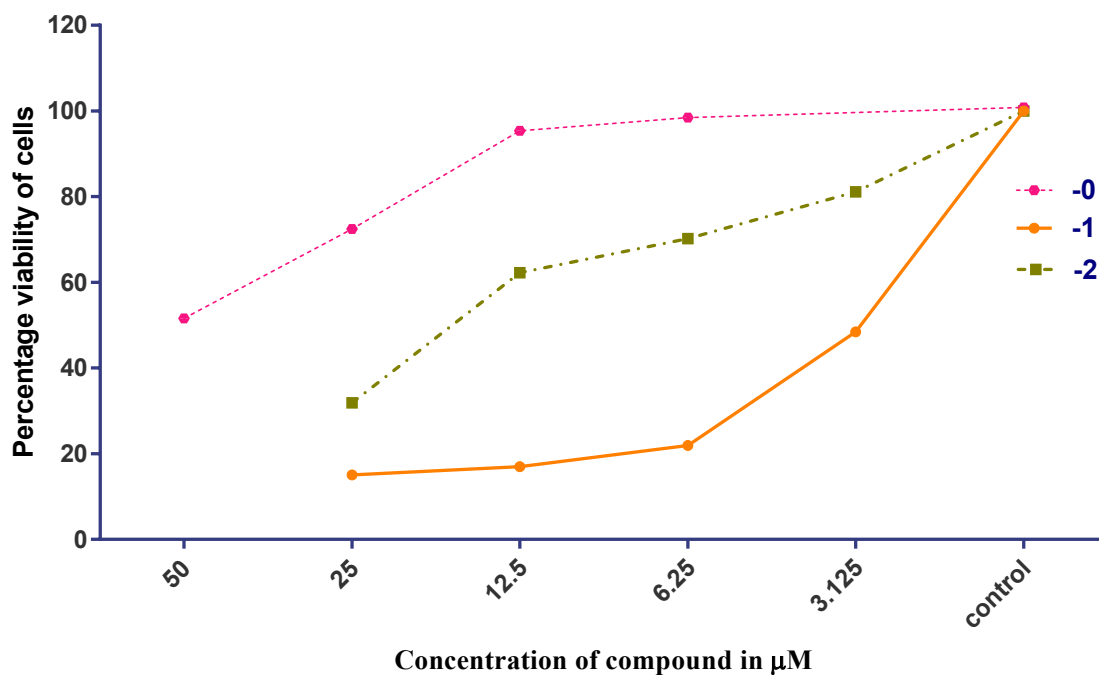

**Fig. 1S** Graph of cytotoxic effect of series complexes (*0-2*) concentrations on cell viability of MG-63 cell line. "\*" represents a statistically significant difference between the various concentrations and respective control groups of the gold complexes. For the comparison of significance between groups, Sidak's multiple comparison test was used according to the GraphPad Prism v6.05. The values having  $p < 0.05$  are considered significant.

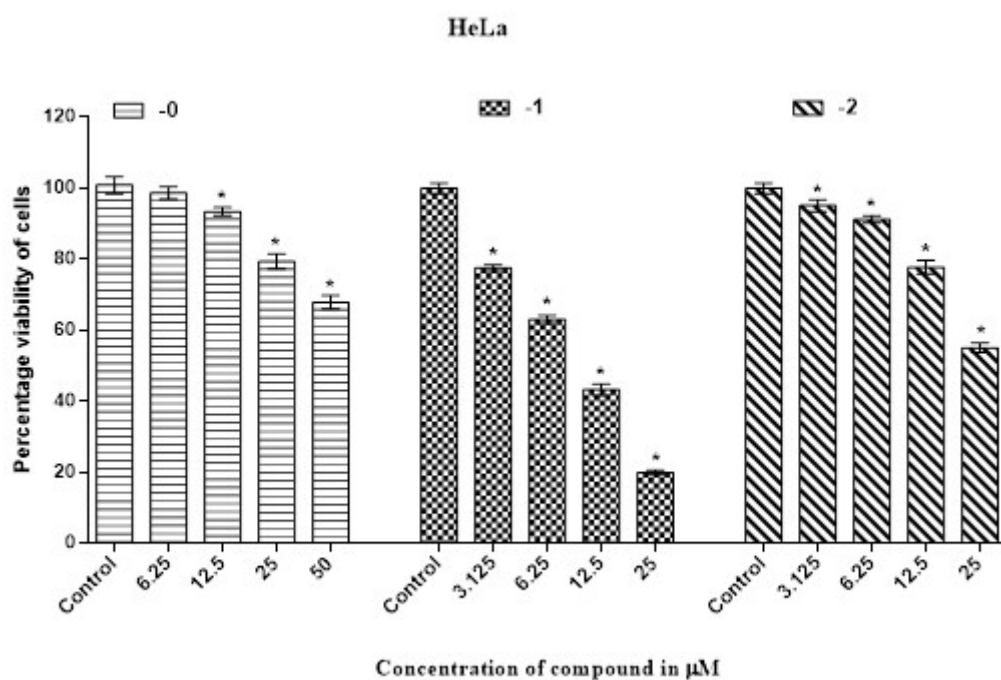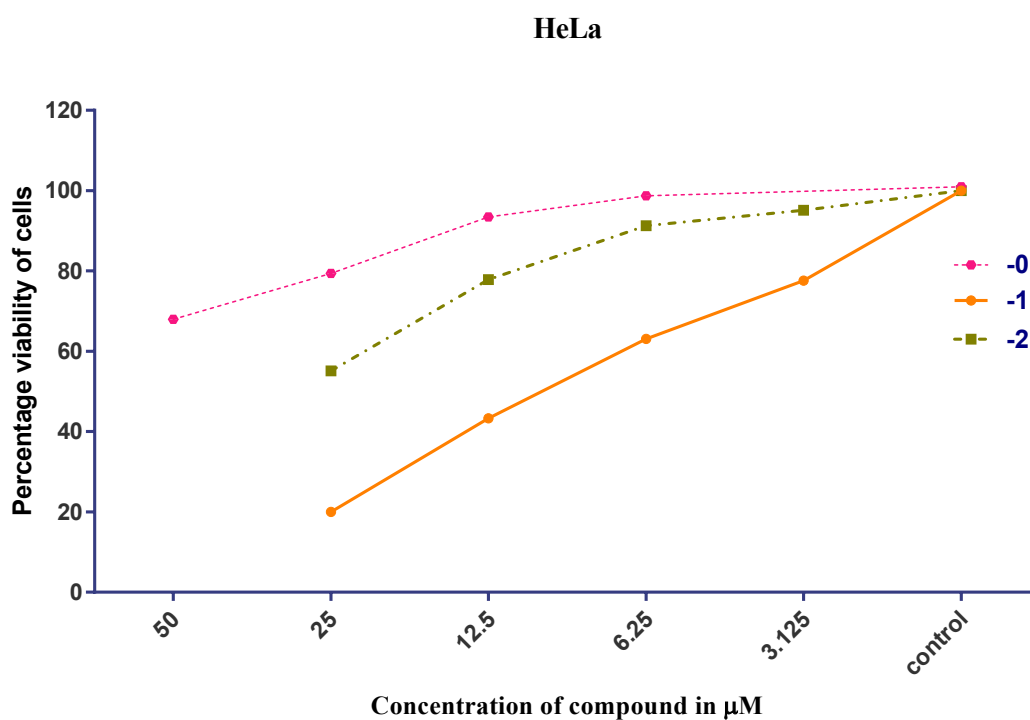

**Fig. 2S** In vitro cytotoxic effect of series complexes (**0-2**) concentrations on cell viability of HeLa cell line. "\*" represents a statistically significant difference between the various concentrations and respective control groups of the gold complexes. For the comparison of significance between groups, Sidak's multiple comparison test was used according to the GraphPad Prism v6.05. The values having  $p < 0.05$  are considered significant.
